# Supplementary material for: Highly Metastatic Subpopulation of TNBC Cells Has Limited Iron Metabolism and Is a Target of Iron Chelators
Source: MDPI journal article supplement (doi:10.3390/cancers15020468), 2023-01-12

Fig 5A p-Akt

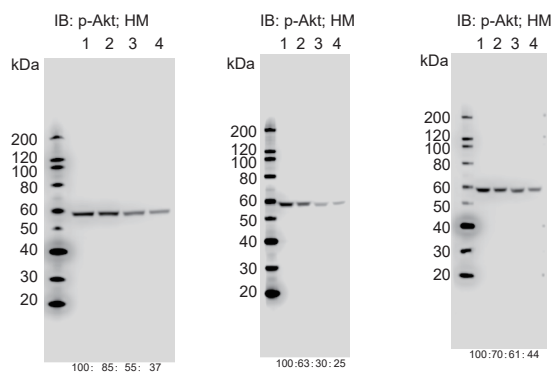

Akt

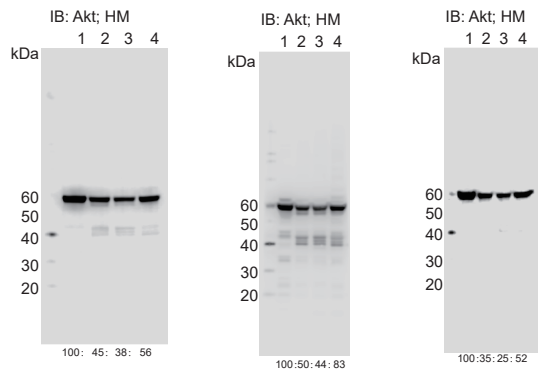

p-mTOR

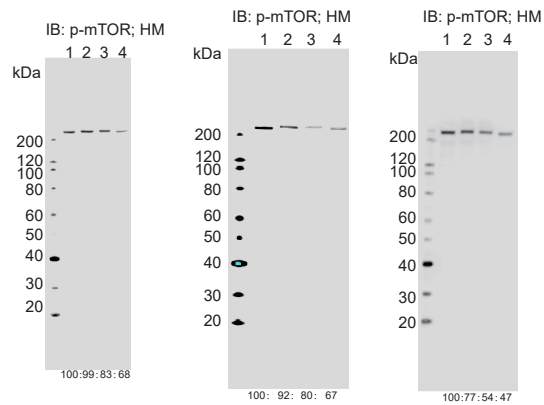

mTOR

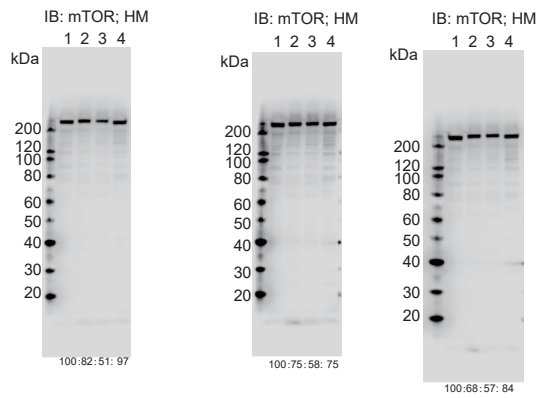

p-P70s6k

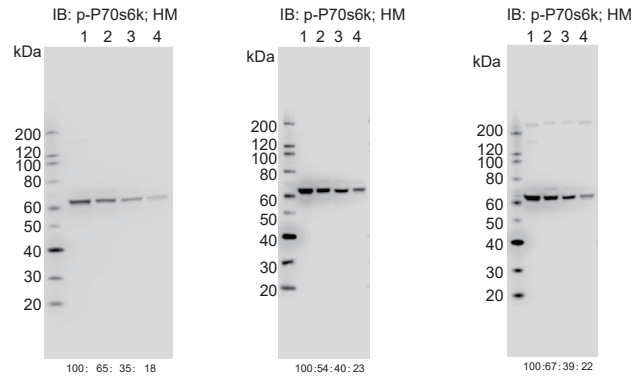

P70s6k

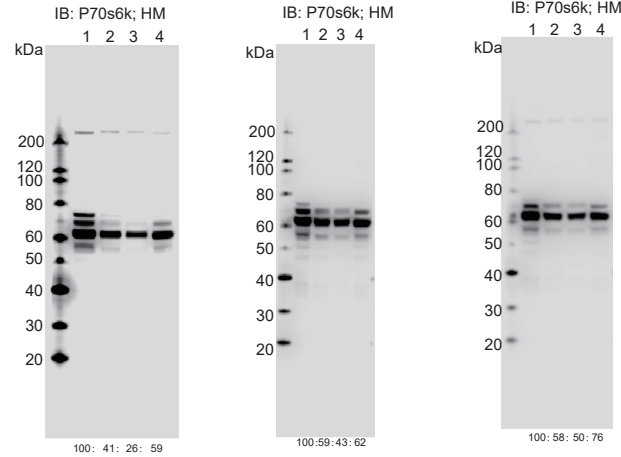

Beta-Actin

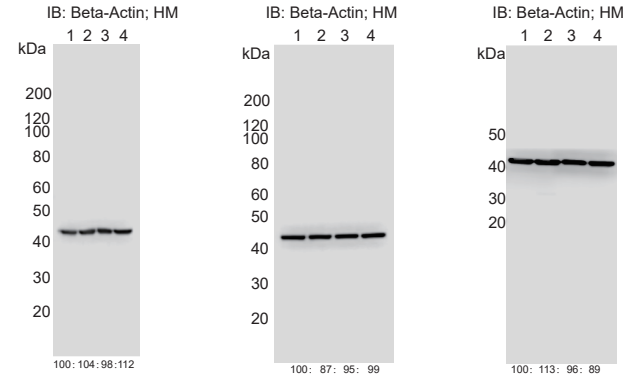

Fig 5B p-Akt

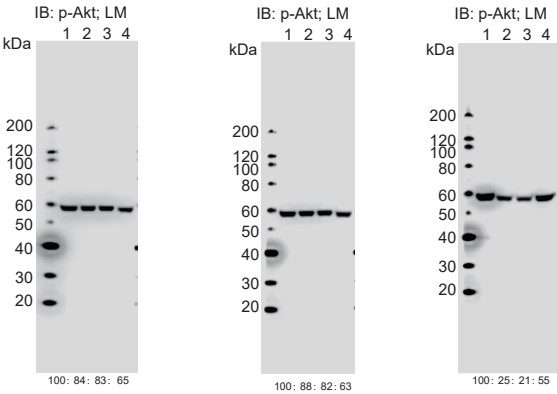

Akt

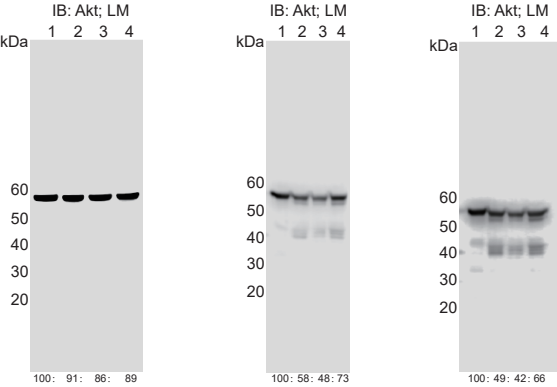

p-mTOR

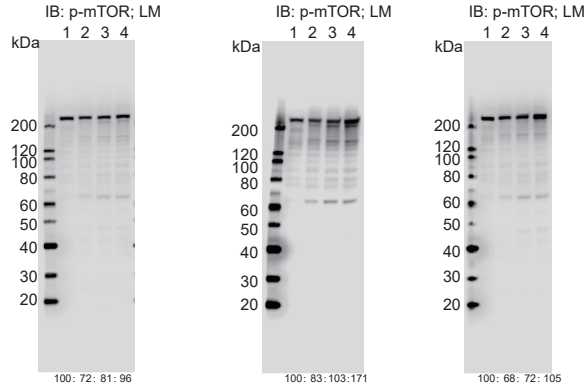

mTOR

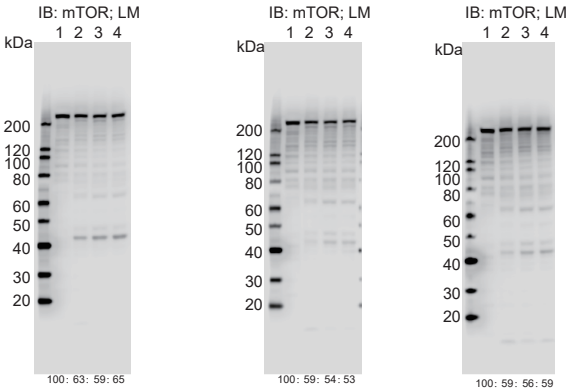

p-P70s6k

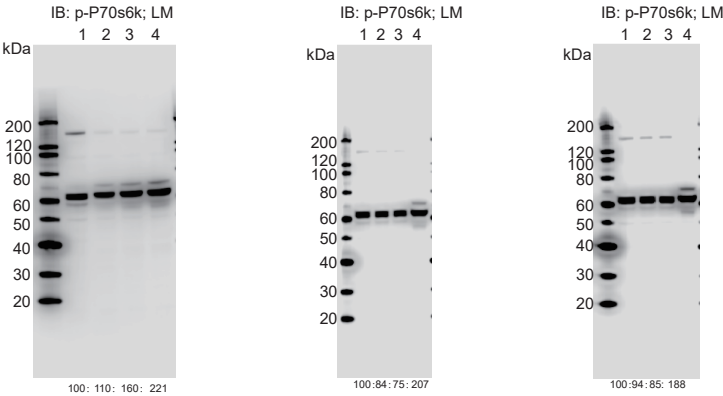

P70s6k

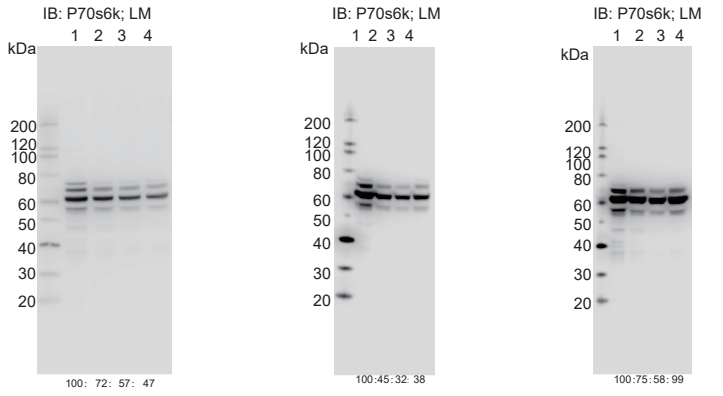

Beta-Actin

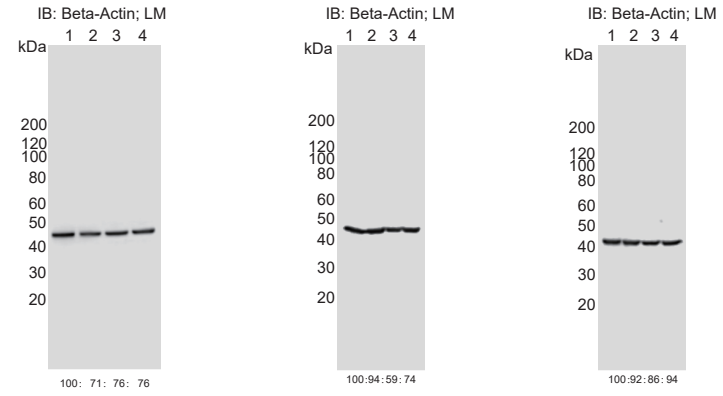

Fig 5D p-AKT

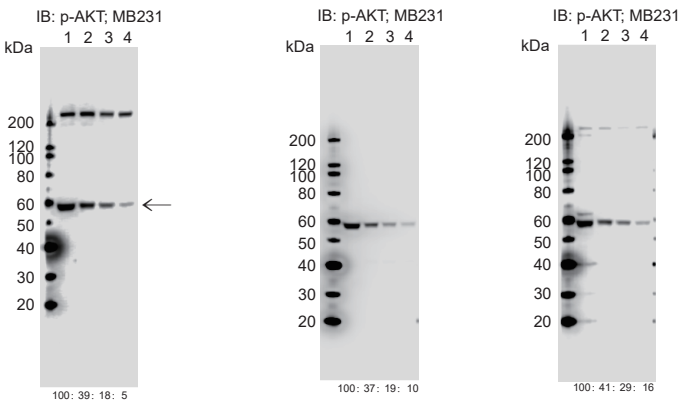

AKT

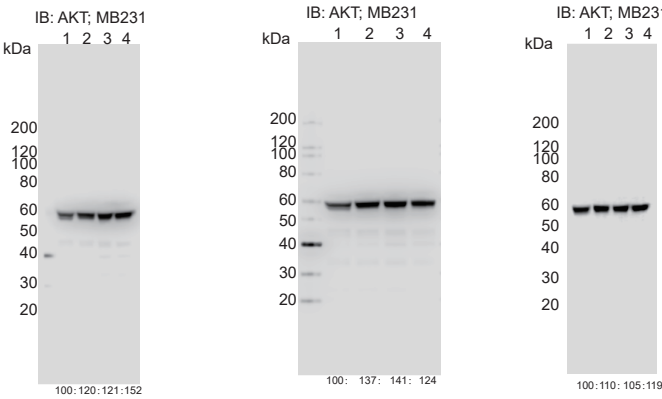

p-mTOR

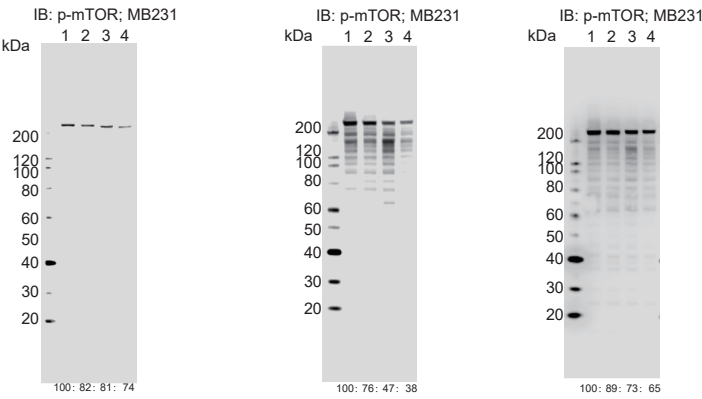

mTOR

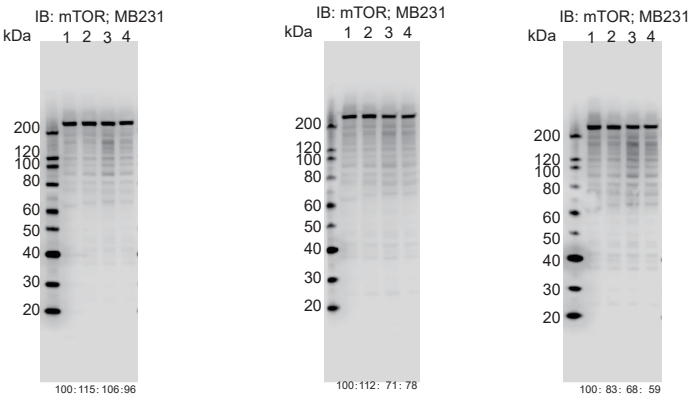

p-P70S6K

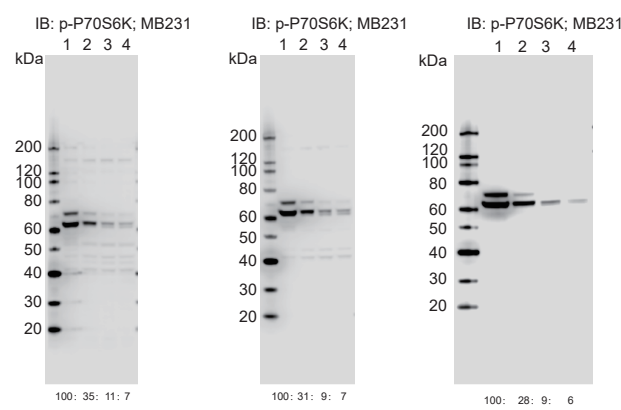

P70S6K

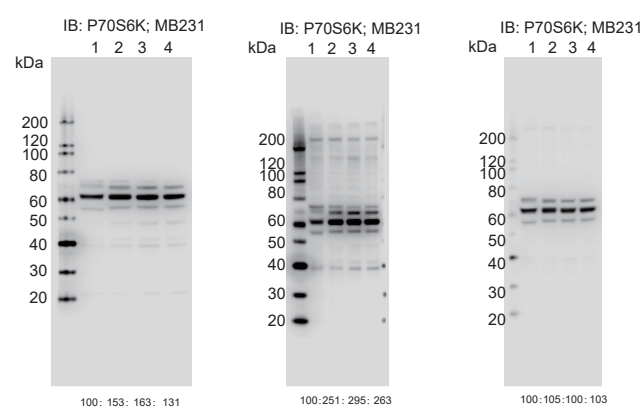

Beta-ACTIN

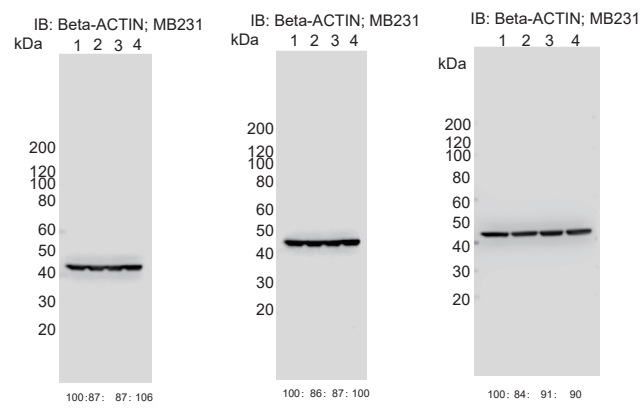

Fig 5E p-AKT

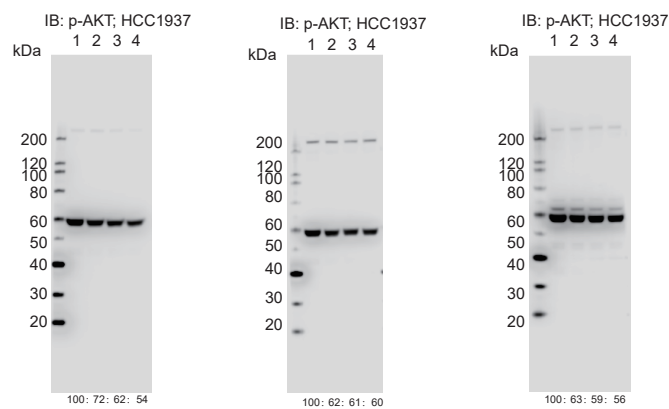

AKT

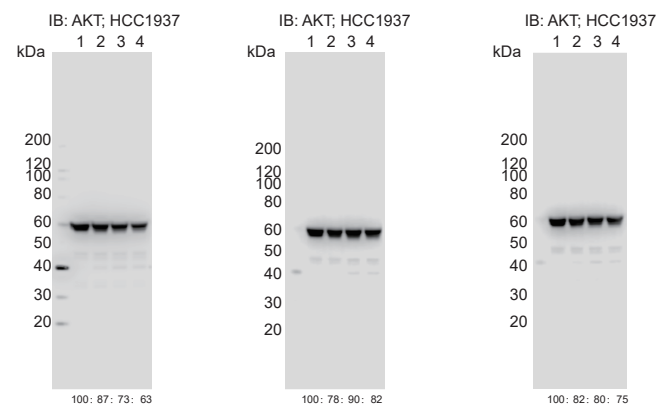

p-mTOR

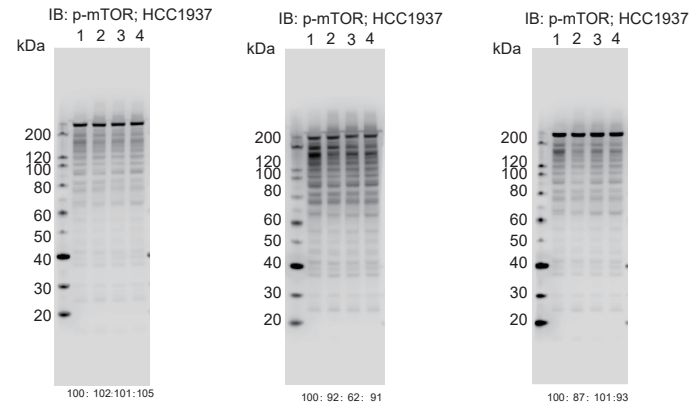

mTOR

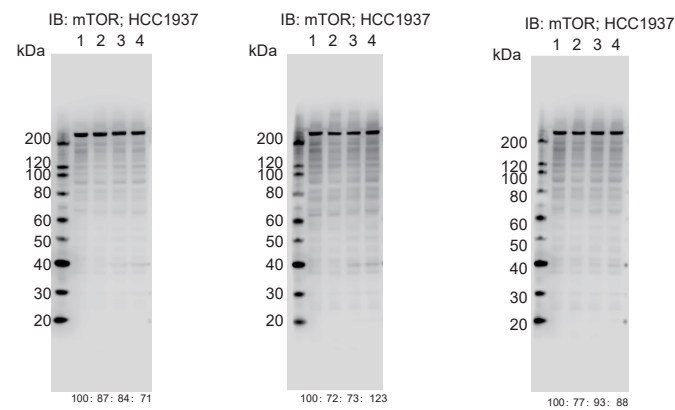

p-P70S6K

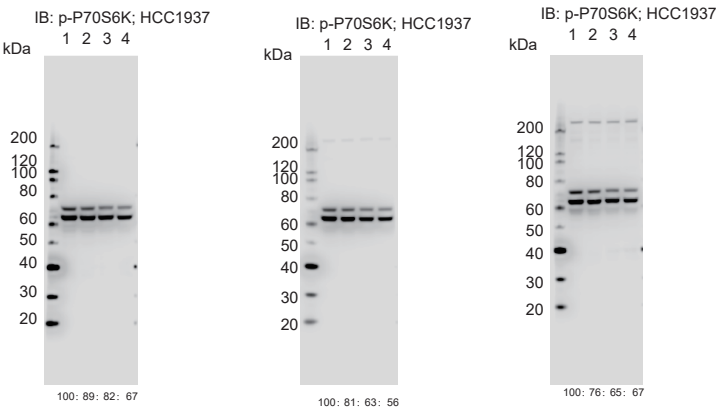

P70S6K

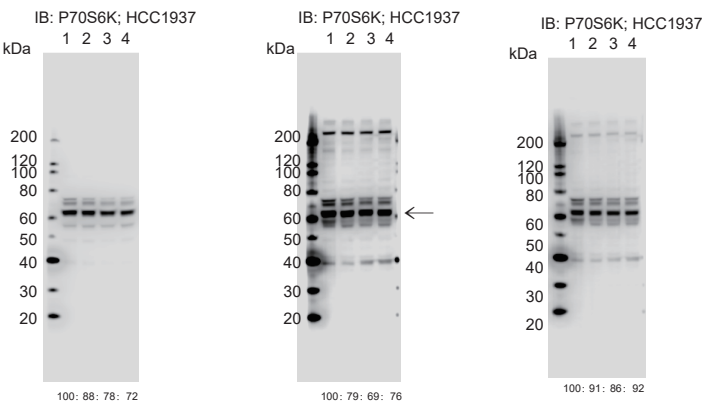

Beta-ACTIN

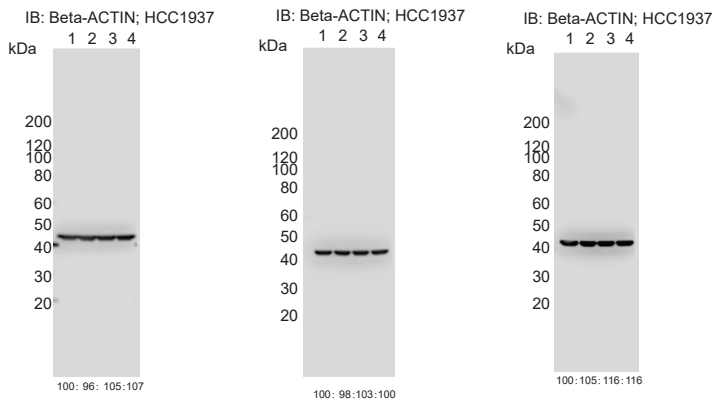



Fig 5G p-mTOR

mTOR

Beta-ACTIN

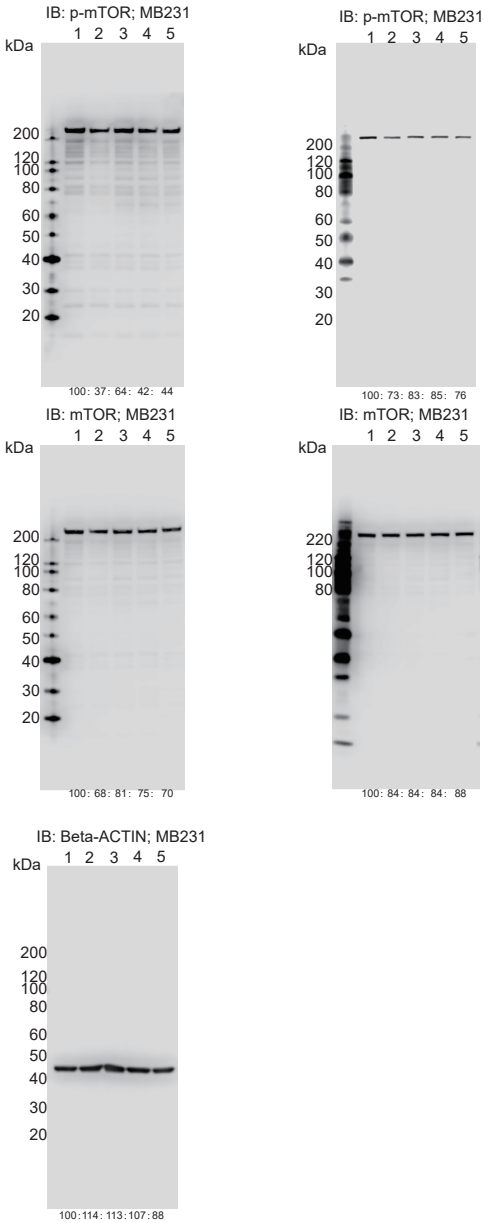

Fig 6A Cleaved and non-Cleaved Parp

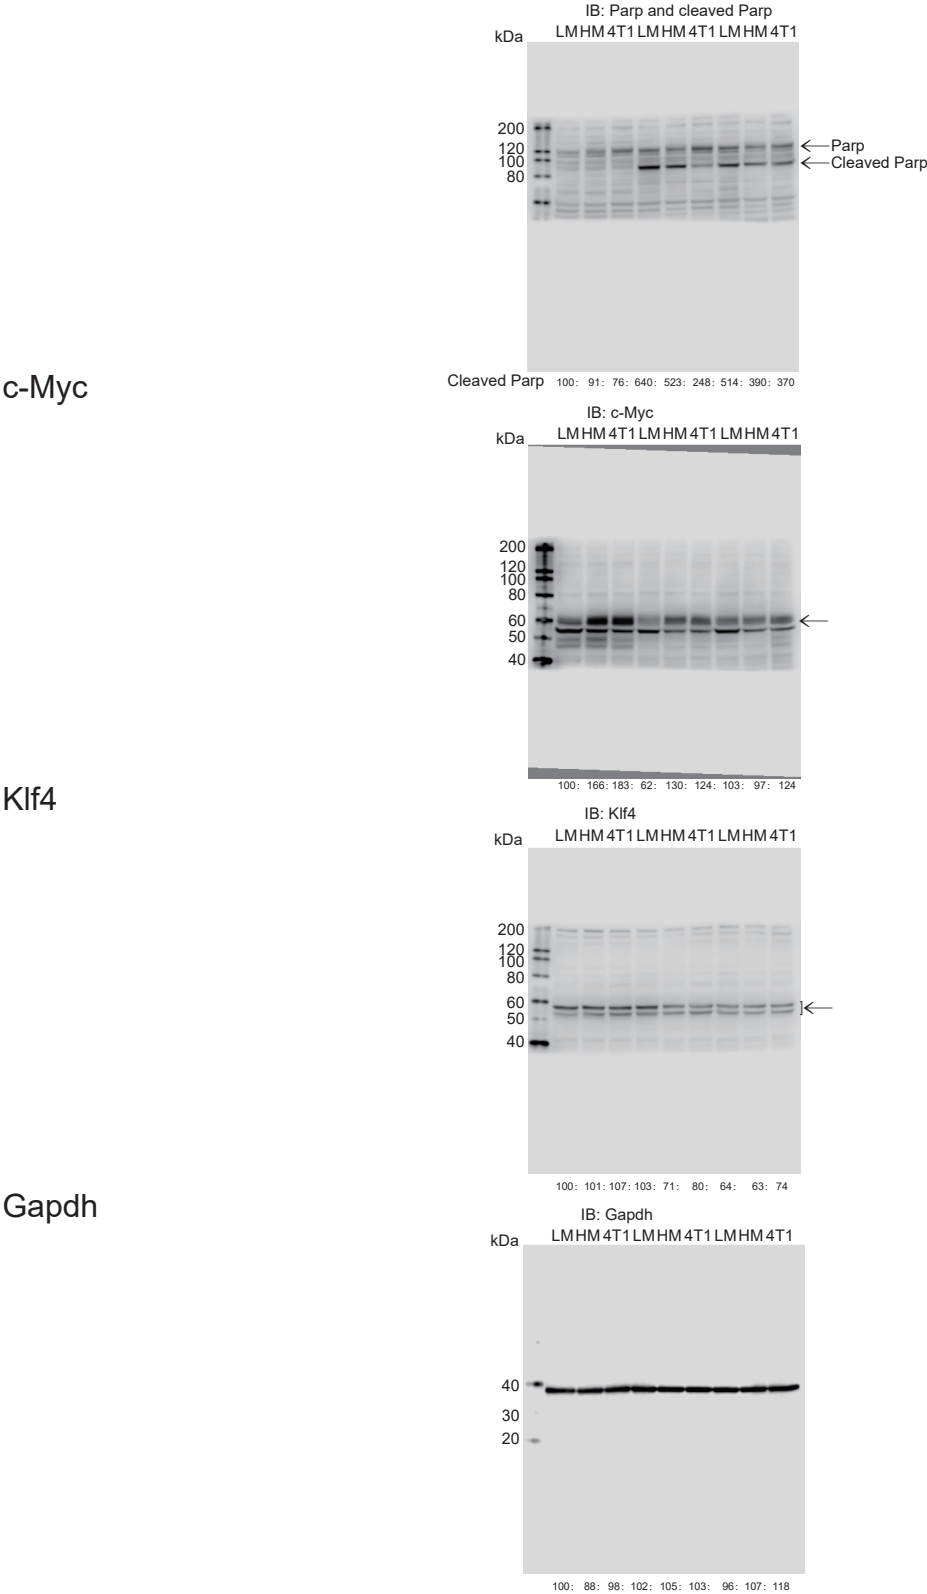

Supp. Fig 5 p-Akt

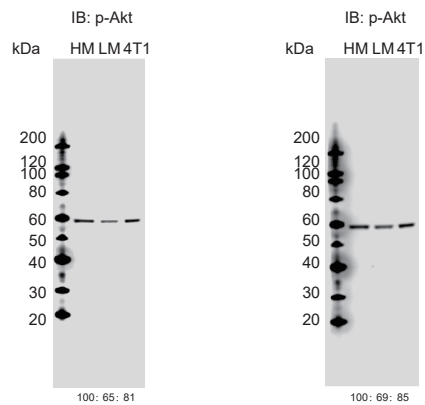

Akt

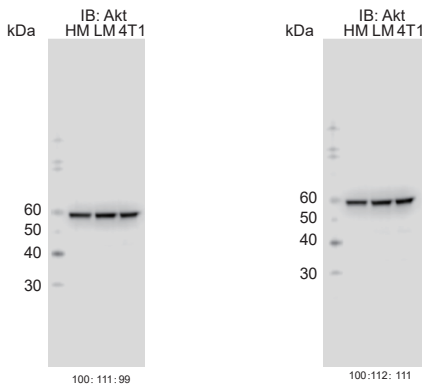

p-mTOR

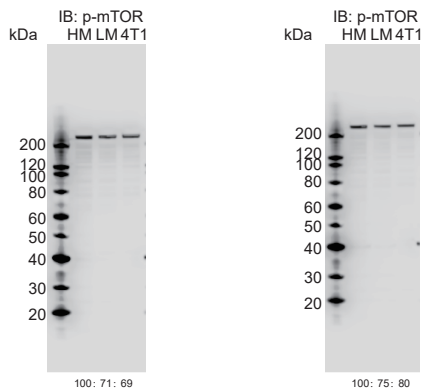

mTOR

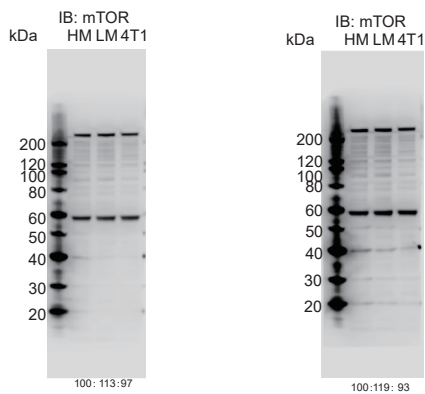

p-P70s6k

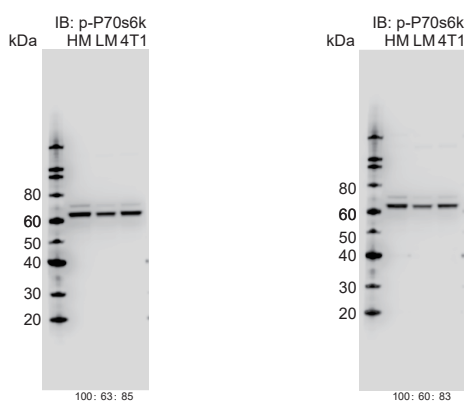

P70s6k

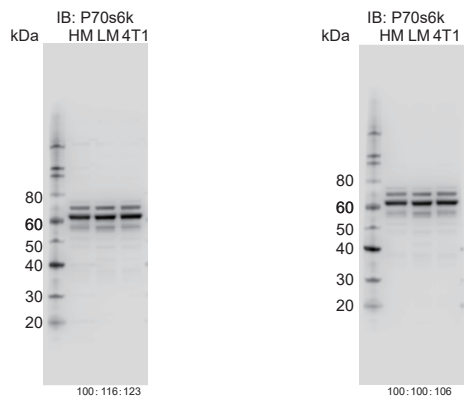

Beta-Actin

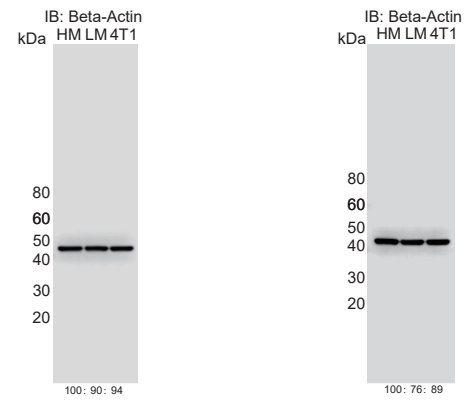

Supplement: s1 [file s1]
