# Supplementary material for: Highly Metastatic Subpopulation of TNBC Cells Has Limited Iron Metabolism and Is a Target of Iron Chelators
Source: MDPI journal article supplement (doi:10.3390/cancers15020468), 2023-01-12

Fig 5 Akt-mTOR targets

p-Akt

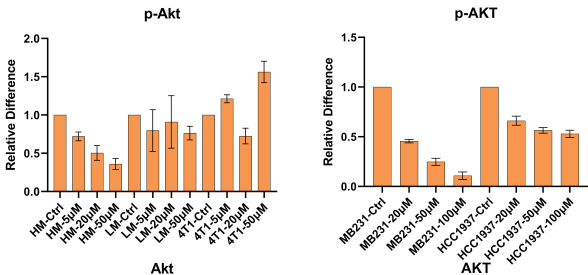

Akt

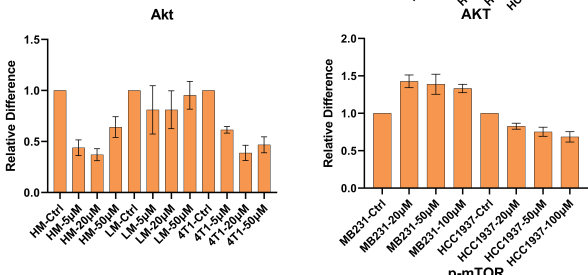

p-mTOR

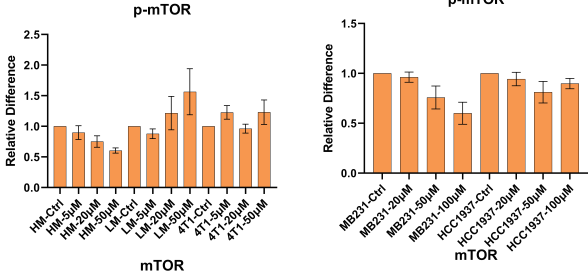

mTOR

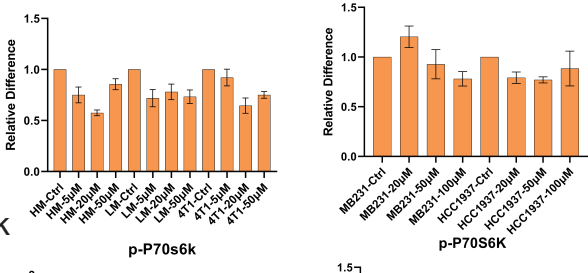

p-P70s6k

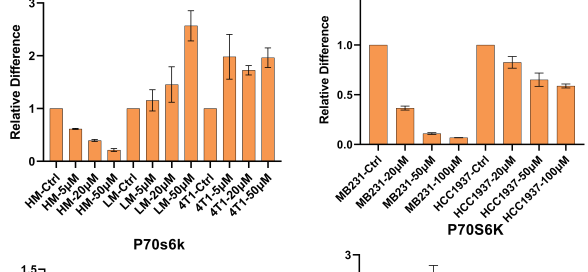

P70s6k

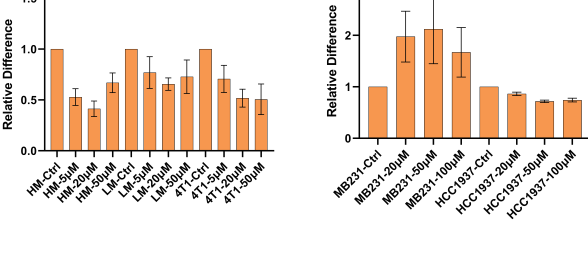

Fig 5H mTOR

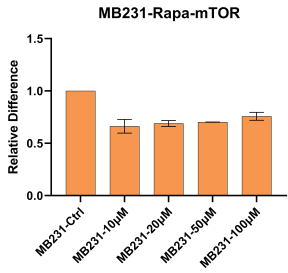

Supp Fig5 p-Akt

Akt

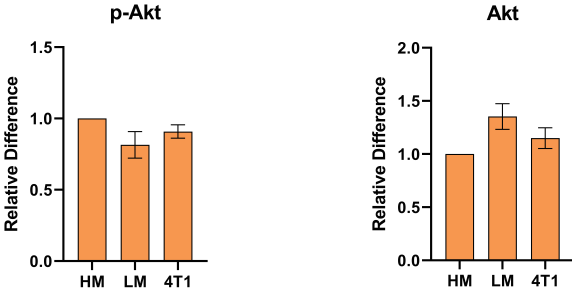

p-mTOR

mTOR

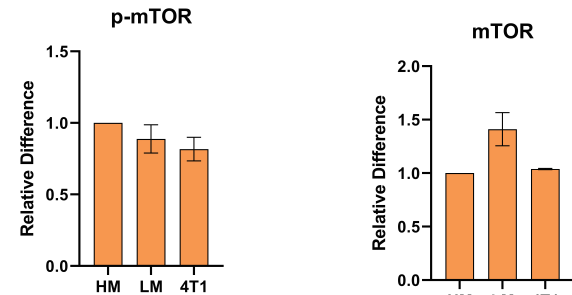

p-P70s6k

P70s6k

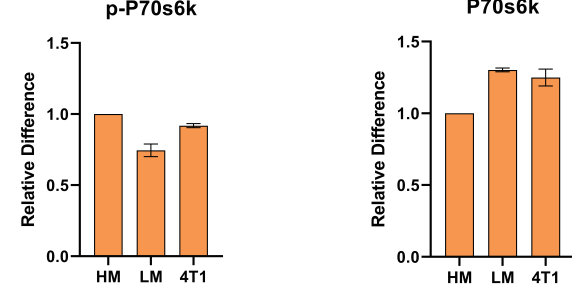

Fig 5H p-mTOR

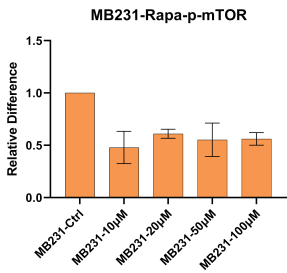

Supplement: s1 [file s1]
