# Supplementary material for: Highly Metastatic Subpopulation of TNBC Cells Has Limited Iron Metabolism and Is a Target of Iron Chelators
Source: MDPI journal article supplement (doi:10.3390/cancers15020468), 2023-01-12
Supplement: s1 [file s1]

**Table S1.** Antibodies applied in this study

| <b>Western blot</b>       |          |              |
|---------------------------|----------|--------------|
| <b>Primary antibody</b>   |          |              |
| Protein name              | Dilution | Company      |
| Cleaved-Parp              | 1:1000   | CST #5625    |
| c-Myc                     | 1:1000   | CST #5605    |
| Klf4                      | 1:1000   | CST #4038    |
| Phospho-AKT               | 1:1000   | CST #9271    |
| AKT                       | 1:1000   | CST #4691    |
| Phospho-mTOR              | 1:1000   | CST #5536    |
| mTOR                      | 1:1000   | CST #2983    |
| Phospho-p70S6K            | 1:1000   | CST #9234    |
| p70S6K                    | 1:1000   | CST #9202    |
| $\beta$ -actin            | 1:5000   | Sigma #A5441 |
| GAPDH                     | 1:5000   | CST #5174    |
| <b>Secondary antibody</b> |          |              |
| Goat anti-rabbit IgG HRP  | 1:2000   | CST #7074    |
| Goat anti-mouse IgG HRP   | 1:2000   | CST #91196   |

CST(Cell Signaling Technology, Danvers, Massachusetts)

Abcam(Abcam, Cambridge, UK)

Sigma(Sigma Corporation, Setagaya, Japan)

Bioss(Bioss, Boston, Massachusett)
