# Supplementary material for: Highly Metastatic Subpopulation of TNBC Cells Has Limited Iron Metabolism and Is a Target of Iron Chelators
Source: Cancers (Basel). 2023 Jan 12;15(2):468. doi: 10.3390/cancers15020468 (PMC9856351; doi:10.3390/cancers15020468)
Supplement: Supplementary file 1 [file cancers-15-00468-s001.zip]

Archive with 4 entries (4 files):
- Supp Figures.pdf
- Table S1.pdf
- WB histogram.pdf
- WB Whole blotting.pdf
